# Supplementary material for: Bright and Blind Spots of Water Research in Latin America and theCaribbean
Source: Copernicus journal article supplement (doi:10.5194/hess-2021-106), 2021-03-08
Supplement: Supplementary file 1 [file hess-2021-106-supplement.zip]

Archive with 2 entries (2 files):
- Data S1 - Socio-hydrologic attributes - Sheet1.csv
- supplementary-materials.pdf
