# Supplementary material for: Bright and Blind Spots of Water Research in Latin America and theCaribbean
Source: Copernicus journal article supplement (doi:10.5194/hess-2021-106), 2021-03-08
Supplement: Supplementary file 1 [file hess-2021-106-supplement.zip › Data S1 - Socio-hydrologic attributes - Sheet1.csv]

COUNTRY	pop_density	annual_precip	NRI	depend_ratio	variability	dam_cap	dam_cap_percap	withdrawl	ag_withdrawl	ind_withdrawl	mun_withdrawl	withdrawl_percap	surface_withdrawl	ground_withdrawl	fresh_withdrawl	water_stress	irrig_actual	ag_area	harvest_total	harvest_temp	harvest_perm	irrig_intensity	flood	drink_total	drink_rural	drink_urban	SPI (2017)	SPI_basic_human	SPI_found	SPI_opp	LAC_hazard	LAC_vuln	LAC_cope	democracy	EPI.current	HLT.current	ECO.current	GDP_2015	population_2015	land_area	inland_water	inland_water_percent	GDP_percap	muni_withdrawl_percap	ag_area_percent
Antigua and Barbuda	208.7	1030		0		0.006	65.35	0.0115	15.65	21.74	62.61	129.1	0.0037	0.0007	0.0044	8.462	100	0.3845	0.3845	0.2833	0.1012	100	3.6	97.9	97.9	97.9					3.2	2.6	4.3	0	59.18	76.53	47.61	1359194737	99923	44			1.36E+04	2.76E+01	0.008738636
Argentina	15.62	591	1062	66.67	1.8	131.6	3031	37.78	73.93	10.59	15.48	897.5	26.36	11.33	37.69	6.644	91.73	2357	2300	1741	559	106.4	2.5	99.1	100	99	74.84	82.14	78.81	63.56	4	3.8	3.8	0.7706	59.3	79.88	45.58	5.95E+11	43417765	282411	4371	0.015477442	1.37E+04	1.34E+02	0.008345992
Bahamas	27.95	1292	1320	0														1						98.4	98.4	98.4					4.8	2.4	4.6	0	54.99	73.68	42.52	11792300000	386838	1775	387	0.218028169	30483.8201		0.00056338
Barbados	660.9	1422		0				0.081	67.65	7.654	24.69	293.3			0.07	87.5	100	5.435					3.6	99.7	99.7	99.7	75.51	89.02	75.6	61.9	2.4	2.8	2.9	0	55.76	84.73	36.45	4584150000	284217	43			16129.04928	6.08E+01	0.126395349
Belize	15.64	1705	2013	29.79	2.2	0.1217	338.7	0.101	67.72	20.99	11.29	385.2			0.101	0.6872	100	3.548	3.548	1.612	1.936	100	2.6	99.5	100	98.9					5.5	3.8	4.5	0	57.79	65.09	52.93	1762500450	359288	2313	16	0.006917423	4905.536645	3.17E+01	0.001533939
Bolivia	9.763	1146	1503	47.13	3.1	0.5951	55.49	2.088	91.95	1.533	6.513	203.9			2.088	0.5265	100	297.2	284.2	244.3	39.92	103.7	3.1	90	75.6	96.7	65.05	73.02	68.56	53.58	5.4	6.5	6.6	0.6766	55.98	61.64	52.21	33000198263	10724705	111386	1528	0.013718062	3077.026199	1.27E+01	0.002668199
Brazil	24.41	1761	1934	34.53	2.5	700.4	3370	74.83	60	17	23	369.7			74.78	1.323	96.81	5400	5329	4798	476	119.6	3.1	98.1	87	100	72.76	79.22	78.07	60.98	6.6	4.5	4.8	0.7972	60.7	67.44	56.21	1.80E+12	205962108	867340	15763	0.018173957	8739.471631	8.35E+01	0.006225932
Chile	23.74	1522	2483	4.123	3.5	14.44	804.5	35.43	83.04	13.39	3.576	2152	32.59	2.778	35.36	5.497	98.65	1109	1094	626.8	367	100	2.5	99	93.3	99.7	80.36	90.57	82.77	67.73	4.9	3.2	3	0.8118	57.49	73.73	46.66	2.44E+11	17762681	76987	1316.8	0.017104186	13736.66509	7.12E+01	0.014405029
Colombia	42.24	3240	2862	9.11	1.5	11.28	233.9	11.77	54.3	19.05	26.63	251.1	10.69	1.073	11.77	0.8558	36.25	1087	524	487	37	133	3.7	91.4	73.8	96.8	70.65	79.43	77.59	54.94	7.8	7.1	6.4	0.6976	65.22	71.05	61.33	2.93E+11	48228697	117400	3224.9	0.027469336	6075.221149	6.50E+01	0.009258944
Costa Rica	94.09	2926	2865	0	2.4	1.997	415.3	2.35	56.6	11.06	32.34	488.8	1.554	0.7933	2.347	3.065	100	101.5	101.5	84.06	17.25	100	3.1	97.8	91.9	99.6	80.81	88.27	85.52	68.63	4.7	3.9	3.8	0.8955	67.85	76.44	62.13	54775994478	4807852	5114	4	0.000782167	11393.02842	1.58E+02	0.019847478
Cuba	103.7	1335	1103	0	2.3	9.384	827.3	6.959	64.94	10.63	24.43	611	4.314	2.644	6.959	25.62	88.2	557.6	491.8	423.7	68.1	100	3	94.9	89.8	96.4	69.32	87	71.93	49.04	5.7	3.6	4.2	0.2161	63.42	75.76	55.2	87133000000	11461432	11574	586	0.050630724	7602.278668	1.48E+02	0.048176948
Dominica	96.91	2083		0				0.02	5	0	95	279	0.02	0	0.02	10		0.2					3.6	94.4	91.8	95.7					3.6	4.4	3.3	0	59.38	69.45	52.67	540830666.7	73162	75			7392.234585	2.60E+02	0.002666667
Dominican Republic	216.3	1410	820.9	0	1.5	2.301	218.6	7.156	79.86	8.189	11.95	704.7		0.386	7.137	43.73	100	306.5	296.2	256.2	39.98	137	3.7	84.7	81.9	85.4	65.66	75.41	71.87	49.7	6.1	5.6	6.9	0.6582	64.71	64.86	64.61	68802092021	10528394	4903	36	0.007342443	6534.908555	8.10E+01	0.062512747
Ecuador	62.97	2274	2575	0	2.8	7.692	476.5	9.918	81.43	5.535	13.04	698.2			9.916	3.736	62.8	1500	666.3	409.4	257	107.5	3.2	86.9	75.5	93.4	69.3	79.54	74.62	53.72	6.6	6.2	6.2	0.6895	57.42	72.58	47.31	99290381000	16144368	26438	801	0.030297299	6150.155955	8.01E+01	0.056736516
El Salvador	291.2	1784	1434	40.5	3.5	3.879	633.1	2.118	67.56	10.06	22.38	353.8	1.483	0.635	2.118	11.37	74.82	45.23	33.84	20.26	2.082	100	3.8	93.8	86.5	97.5	64.94	75.48	71.97	47.36	8.3	5	7.7	0.7404	53.91	63.99	47.19	23166030400	6312478	2136	32	0.014981273	3669.878992	7.51E+01	0.021175094
Grenada	314.1	2350		0		2.00E-05	0.1873	0.0141	14.89	0	85.11	132	0.0131	0.001	0.0141	7.05	100	0.365	0.365	0.365	0	100		96.6	95.3	99					1	3.2	4.1	0	50.93	69.82	38.34	997007925.9	125890949	34			7.919615618	9.53E-02	0.010735294
Guatemala	150.1	1996	2216	14.63	3.1	0.4638	28.38	3.324	56.74	18.14	25.12	240.9			3.324	3.761	100	337.5	352	249.2	102.9	112.8	3.5	92.8	86.8	98.4	60.28	70.88	68.12	41.84	8.5	8.3	8.1	0.7436	52.33	54.97	50.57	63767597194	16252429	11062	173	0.015639125	3923.573344	5.14E+01	0.030509854
Guyana	3.568	2387	2177	11.07	2.1	0.8092	1055	1.445	94.33	1.412	4.242	1905			1.445	0.8622	89.16	143	179	177	2	140.4	2.4	98.3	98.3	98.2	61.52	75.73	57.63	51.21	4	5.9	6.3	0	47.93	61.55	38.86	3197222215	768514	23309	1812	0.077738213	4160.265415	7.98E+01	0.006134969
Haiti	386	1440	1226	7.237	1.9	0.297	27.73	1.45	83.38	3.517	13.1	140.9			1.45	15.64	71.5	97	109.5	100.5	9		3.9	57.7	47.6	64.9		46.69		36.41	7.7	8.3	8.3	0.4262	33.74	45.24	26.08	8724656126	10711061	2794	19	0.006800286	814.5463952	1.77E+01	0.034717251
Honduras	71.78	1976	1618	1.632	2.9	5.805	718.9	1.607	73.3	7.094	19.6	225.3	1.443	0.164	1.607	2.494	92.92	89.7	87.43	59.33	28.11	88.2	3.6	91.2	83.8	97.4	58.18	70.32	59.55	44.66	8.3	8.1	8.1	0.6335	51.51	55.95	48.54	20979767785	8960829	11309	60	0.005305509	2341.27532	3.51E+01	0.007931736
Jamaica	254.1	2051	1328	0		0.0055	1.969	0.812	55.17	9.36	35.47	300.2	0.074	0.8535	0.8115	11.34	100	30.68	30.68	20.68	10	100	3.5	93.8	89.4	97.5		79.92		61.79	5.9	4.2	6.6	0.784	58.58	68.48	51.98	14145469269	2871934	1115	16	0.014349776	4925.415859	1.00E+02	0.027515695
Mexico	65.75	758	1052	11.53	3.1	150	1241	86.58	76.29	9.183	14.53	670.3	52.35	33.31	86.58	32.48	86.06	6460	5967	4285	1682	100.3	2.9	96.1	92.1	97.2	69.97	80.82	73.04	56.06	8.4	5.6	5.1	0.6844	59.69	66.04	55.46	1.17E+12	125890949	198480	2042.5	0.010290709	9293.757886	9.99E+01	0.03254736
Nicaragua	46.65	2280	2013	5.051	2.9	32.01	5263	1.545	76.7	4.764	18.51	262.9			1.545	1.349	72.38	199.1	144.1	110.3	33.8	100	3.6	87	69.4	99.3	63.34	75.15	69.17	45.71	6.8	5.6	7.4	0.5579	55.04	62.2	50.27	12611087031	6082035	14040	1003	0.071438746	2073.497938	4.70E+01	0.014180912
Panama	52.09	2928	2461	1.941	2.4	9.137	2326	1.037	43.01	0.9643	56.03	277			1.037	1.049	100	32.14	44.68	42.5	1.207	139	2.8	94.7	88.6	97.7	72.38	82.06	75.92	59.17	4.1	5.2	5.3	0.7796	62.71	66.96	59.87	54091713776	3969249	7650	108	0.014117647	13627.69475	1.46E+02	0.004201307
Paraguay	16.32	1130	1228	69.83	2.1	33.53	5050	2.413	78.62	6.382	15	378.3	1.969	0.444	2.413	0.9331	100	136.2	136.2	135.4	0.81	100	3.3	98	94.9	100	64.82	79.6	65.84	49.03	3.5	4.5	6.5	0.6775	53.93	58.1	51.15	36164068797	6639119	41620.4	945.2	0.022710017	5447.118631	5.45E+01	0.003272434
Peru	24.41	1738	2229	12.7	2.9	5.773	184	13.66	88.73	2.116	9.18	452.9	11.8	1.765	13.56	1.161	70.08	2580	1124	975.1	148.9	101.4	2.8	86.7	69.2	91.4	69.89	78.51	76.76	54.41	5.8	6.2	6.1	0.7536	61.92	56.49	65.53	1.90E+11	31376671	129044	522	0.004045132	6055.454385	3.97E+01	0.019993181
St. Kitts and Nevis	213.7	1427		0				0.0156	1.282	0	98.72	290.8	0.0046	0.0076	0.0123	51.25		0.025	0.025	0.025	0			98.3	98.3	98.3					3.8	3.4	5.6	0				936314411.5	54288	26			17247.17086	2.24E+02	0.000961538
St. Lucia	298.4	2301		0		0.003	16.58	0.0429	70.86	0	29.14	252.1			0.0429	14.3		3					3.6	96.3	95.6	99.5					3.2	3.2	4.4	0	56.18	71.03	46.28	1622436704	177206	63	1	0.015873016	9155.65333	7.05E+01	0.047619048
St. Vincent and the Grenadines	280.8	1583		0				0.0085	0	0.0235	100	77.63	0.0079	0	0.0079	11.17		0.478					3.6	95.1	95.1	95.1					3.3	3.9	3.5	0	66.48	67.38	65.88	755458031.4	109455	39			6901.996541	7.22E+01	0.01225641
Suriname	3.315	2331	1848	0	2.6	20	36832	0.6159	70	22	8.005	1229	0.5666	0.0493	0.6159	0.9565	100	57	57	55	2	100	1.4	94.8	88.4	98.1	67.18	77.06	64.8	59.69	2.8	2.7	5.4	0	54.2	62.46	48.68	4767414748	553208	17164	782	0.045560475	8617.76176	8.91E+01	0.003320904
Trinidad and Tobago	265.1	2200	1839	0		0.0715	52.57	0.3832	4.358	33.64	62	285.5	0.2284	0.1078	0.3362	12.33	71.43	7					2.2	95.1	95.1	95.1	0	82.85	0	59.45	3.8	2.9	6.4	0.745	67.36	81.44	57.96	24401734195	1360092	513			17941.23794	1.53E+02	0.013645224
Uruguay	19.48	1300	1550	46.46	1.1	17.15	4997	3.66	86.61	2.186	11.2	1100	3.52	0.14	3.66	3.523	100	238	262.8	227.6	14.16	110.4	3	99.7	93.9	100	79.61	86.61	79	73.22	2.1	3.1	2.8	0.8369	64.65	84.72	51.27	53274304222	3431552	17742	120	0.006763612	15524.84247	1.19E+02	0.013414497
Venezuela	34.11	2044	1813	39.25	2.3	157.6	5066	22.63	73.84	3.506	22.64	817.8			22.62	2.579	92.78	1055	978.8	426.1	257	100	2.7	93.1	77.9	95					8.2	6.1	6.6	0.4877	63.89	75.74	55.99	4.82E+11	31155134	94205	3000	0.031845443	15470.9654	1.64E+02	0.011198981
