# Supplementary material for: Bright and Blind Spots of Water Research in Latin America and theCaribbean
Source: Copernicus journal article supplement (doi:10.5194/hess-2021-106), 2021-03-08
Supplement: Supplementary file 1 [file hess-2021-106-supplement.zip › supplementary-materials.pdf]

# **Materials Methods and Supplementary Materials for**

## **Bright and Blind Spots of Water Research in Latin America and the Caribbean**

Alyssa J. DeVincentis , Hervé Guillon, Romina Díaz Gómez, Noelle K. Patterson, Francine van den Brandeler, Arthur Koehl, J. Pablo Ortiz-Partida, Laura E. Garza-Díaz, Jennifer Gamez-Rodríguez, Erfan Goharian, Samuel Sandoval Solis

Correspondence to: [ajdevincentis@ucdavis.edu](mailto:ajdevincentis@ucdavis.edu)

### **This file includes:**

Tables S1 to S7

Caption for Data S1

### **Other Supplementary Materials for this manuscript include the following:**

Data S1

13 **Table S1.** Corpus collection details.

| Language   | Number of non-duplicate query returns | Number of documents automatically collected | Number of documents manually collected | Final Corpus Size |
|------------|---------------------------------------|---------------------------------------------|----------------------------------------|-------------------|
| English    | 29,365                                | 21,197 (72%)                                | 0                                      | 21,197 (72%)      |
| Spanish    | 1,411                                 | 122 (8.6%)                                  | 875                                    | 997 (71%)         |
| Portuguese | 777                                   | 300 (39%)                                   | 261                                    | 561 (72%)         |

14

15 **Table S2.** Socio-hydrologic attributes used to cluster countries in Latin America and the  
16 Caribbean.

| Long name                                                                        | Short name        |
|----------------------------------------------------------------------------------|-------------------|
| Population density (inhab/km2)                                                   | pop_density       |
| Long-term average annual precipitation in depth (mm/year)                        | annual_precip     |
| National Rainfall Index (NRI) (mm/year)                                          | NRI               |
| Dependency ratio (%)                                                             | depend_ratio      |
| Seasonal variability (WRI) (-)                                                   | variability       |
| Total dam capacity (km3)                                                         | dam_cap           |
| Dam capacity per capita (m3/inhab)                                               | dam_cap_percap    |
| Total water withdrawal (10 <sup>9</sup> m3/year)                                 | withdrawl         |
| Agricultural water withdrawal as % of total water withdrawal (%)                 | ag_withdrawl      |
| Industrial water withdrawal as % of total water withdrawal (%)                   | ind_withdrawl     |
| Municipal water withdrawal as % of total withdrawal (%)                          | mun_withdrawl     |
| Total water withdrawal per capita (m3/inhab/year)                                | withdrawl_percap  |
| Environmental Flow Requirements (10 <sup>9</sup> m3/year)                        | env_flow          |
| Fresh surface water withdrawal (primary and secondary) (10 <sup>9</sup> m3/year) | surface_withdrawl |
| Fresh groundwater withdrawal (primary and secondary) (10 <sup>9</sup> m3/year)   | ground_withdrawl  |
| Total freshwater withdrawal (primary and secondary) (10 <sup>9</sup> m3/year)    | fresh_withdrawl   |
| SDG 6.4.2. Water Stress (%)                                                      | water_stress      |
| Area equipped for irrigation: total (1000 ha)                                    | irrig_equip       |
| % of the area equipped for irrigation actually irrigated (%)                     | irrig_actual      |
| Total agricultural water managed area (1000 ha)                                  | ag_area           |
| Total harvested irrigated crop area (full control irrigation) (1000 ha)          | harvest_total     |
| Harvested irrigated temporary crop area: Total (1000 ha)                         | harvest_temp      |
| Harvested irrigated permanent crop area: Total (1000 ha)                         | harvest_perm      |
| Irrigated cropping intensity (%)                                                 | irrig_intensity   |
| Flood occurrence (WRI) (-)                                                       | flood             |
| Total population with access to safe drinking-water (JMP) (%)                    | drink_total       |
| Rural population with access to safe drinking-water (JMP) (%)                    | drink_rural       |
| Urban population with access to safe drinking-water (JMP) (%)                    | drink_urban       |
| Social Progress Index (SPI) (2017)                                               | SPI               |
| SPI Basic Human Needs                                                            | SPI_basic_human   |

|                                 |                 |
|---------------------------------|-----------------|
| SPI Foundations of Wellbeing    | SPI_found       |
| SPI Opportunity                 | SPI_opp         |
| LAC Risk Management             | LAC             |
| LAC Hazard & Exposure           | LAC_hazard      |
| LAC Vulnerability               | LAC_vuln        |
| LAC Lack of Coping Capacity     | LAC_cope        |
| Democracy index                 | democracy       |
| Environmental Performance Index | EPI.current     |
| Environmental Health            | HLT.current     |
| Ecosystem Vitality              | ECO.current     |
| GDP_2015                        | GDP_2015        |
| total population_2015           | population_2015 |

18 **Table S3.** Survey questions.

| <b>Question</b>                                                                                                                                               | <b>Options</b>                                                                                                                                                                                                                                                                                           |
|---------------------------------------------------------------------------------------------------------------------------------------------------------------|----------------------------------------------------------------------------------------------------------------------------------------------------------------------------------------------------------------------------------------------------------------------------------------------------------|
| Position                                                                                                                                                      | Graduate student, Post-doctoral researcher, Researcher, Assistant Professor, Associate Professor, Professor                                                                                                                                                                                              |
| Affiliation                                                                                                                                                   | University, Government agency, National lab, Non-governmental organization                                                                                                                                                                                                                               |
| Years of experience as a scientist                                                                                                                            |                                                                                                                                                                                                                                                                                                          |
| Main research discipline                                                                                                                                      | Computer & information sciences, Engineering, Humanities, Agricultural sciences/natural resources, Biological/biomedical sciences, Health sciences, Mathematics & statistics, Atmospheric science & meteorology, Chemistry, Geological & earth sciences, Ocean/marine sciences, Physics, Social sciences |
| Country where you currently live                                                                                                                              |                                                                                                                                                                                                                                                                                                          |
| Country where you were born                                                                                                                                   |                                                                                                                                                                                                                                                                                                          |
| Countries where the majority of your research has been conducted (select top 3)                                                                               |                                                                                                                                                                                                                                                                                                          |
| Countries of researchers you have collaborated with most (select top 3)                                                                                       |                                                                                                                                                                                                                                                                                                          |
| Total number of peer-reviewed research publications                                                                                                           |                                                                                                                                                                                                                                                                                                          |
| Type of journal where you have published the majority of your research                                                                                        | University, Conference proceedings, National research system database journals, International journals                                                                                                                                                                                                   |
| Do you submit research to journals based on their recognition by the national research team?                                                                  |                                                                                                                                                                                                                                                                                                          |
| Main source of research funding                                                                                                                               | Government, Industry, Non-governmental organizations                                                                                                                                                                                                                                                     |
| Describe your interdisciplinary research experience                                                                                                           | Level of interest, Current Level                                                                                                                                                                                                                                                                         |
| Indicate how much do you agree with the following statement:<br>There is sufficient distribution of resources between researchers in Latin American countries |                                                                                                                                                                                                                                                                                                          |
| Indicate how much do you agree with the following statement:<br>There is sufficient funding to study                                                          |                                                                                                                                                                                                                                                                                                          |

|                                                                                                   |  |
|---------------------------------------------------------------------------------------------------|--|
| the impacts of climate change on water resources                                                  |  |
| Do you wish to be contacted in the future as we develop and share the results from this research? |  |
| Please share any additional comments you have on this topic.                                      |  |

20 **Table S4.** Each topic in the English topic model was labeled at five levels.

| <b>Topic ID</b> | <b>Topic name</b>                       | <b>Theme</b>           | <b>NSF specific</b>                 | <b>NSF general</b> | <b>Description</b> |
|-----------------|-----------------------------------------|------------------------|-------------------------------------|--------------------|--------------------|
| 66              | agricultural economics                  | agricultural economics | agricultural economics              | life sciences      |                    |
| 17              | soil amendments                         | agriculture            | agronomy & crop science             | life sciences      |                    |
| 34              | crop yield                              | agriculture            | agronomy & crop science             | life sciences      |                    |
| 46              | agricultural field management           | agriculture            | agronomy & crop science             | life sciences      |                    |
| 1               | air quality                             | air quality            | atmospheric science/meteorology     | physical sciences  |                    |
| 88              | amazon floods                           | amazon floods          | hydrology & water resources         | physical sciences  |                    |
| 97              | analytical chemistry                    | methods                | NA                                  | NA                 | methods            |
| 102             | atmospheric carbon                      | atmosphere             | atmospheric chemistry & climatology | physical sciences  |                    |
| 63              | cloud formation and atmospheric science | atmosphere             | atmospheric science/meteorology     | physical sciences  | water budget       |
| 72              | basin                                   | basin                  | NA                                  | NA                 | spatial scale      |
| 7               | life cycle                              | biology                | biology                             | life sciences      |                    |
| 61              | canopy interception                     | canopy interception    | hydrology & water resources         | physical sciences  | water budget       |
| 5               | organic chemistry                       | chemistry              | organic chemistry                   | physical sciences  |                    |
| 31              | geochemistry                            | chemistry              | geochemistry                        | physical sciences  |                    |
| 55              | isotopes                                | methods                | analytical chemistry                | physical sciences  | methods            |
| 104             | chemical compounds                      | chemistry              | chemistry                           | physical sciences  |                    |
| 105             | adsorption                              | chemistry              | chemistry                           | physical sciences  |                    |
| 95              | climate change impacts                  | climate change impacts | geological & earth sciences         | physical sciences  |                    |
| 24              | mangrove ecology                        | coastal ecology        | ecology                             | life sciences      |                    |

|    |                      |                      |                                          |                   |         |
|----|----------------------|----------------------|------------------------------------------|-------------------|---------|
| 58 | coral reef           | coastal ecology      | marine biology & biological oceanography | physical sciences |         |
| 65 | coastal              | coastal ecology      | NA                                       | NA                |         |
| 91 | coastal water bodies | coastal ecology      | NA                                       | NA                |         |
| 32 | community studies    | methods              | sociology                                | social sciences   | methods |
| 84 | signal processing    | methods              | NA                                       | NA                | methods |
| 41 | desalination         | desalination         | civil engineering                        | engineering       |         |
| 90 | ecosystem management | ecosystem management | environmental science                    | life sciences     |         |
| 36 | population genetics  | evolutionary ecology | genetics/genomics, human & animal        | life sciences     |         |
| 96 | population ecology   | evolutionary ecology | ecology                                  | life sciences     |         |
| 86 | experimental design  | methods              | NA                                       | NA                |         |
| 76 | animal anatomy       | fauna                | biology                                  | life sciences     |         |
| 81 | wildlife biology     | fauna                | wildlife biology                         | life sciences     |         |
| 4  | zootechnics          | fauna                | animal science                           | life sciences     |         |
| 6  | fish ecology         | fish                 | animal science                           | life sciences     |         |
| 79 | food science         | food science         | food science                             | life sciences     |         |
| 89 | forests              | forests              | forest science & biology                 | life sciences     |         |
| 48 | oil                  | fuel                 | petroleum engineering                    | engineering       |         |
| 56 | biofuel              | fuel                 | industrial & manufacturing engineering   | engineering       |         |
| 83 | offshore drilling    | fuel                 | petroleum engineering                    | engineering       |         |
| 9  | mineralogy           | geology              | mineralogy/petrology                     | physical sciences |         |
| 45 | sedimentary geology  | geology              | geology                                  | physical sciences |         |
| 80 | hydrothermal         | geology              | geophysics & seismology                  | physical sciences |         |
| 25 | volcanology          | geology              | geophysics & seismology                  | physical sciences |         |

|     |                                    |                            |                                         |                          |               |
|-----|------------------------------------|----------------------------|-----------------------------------------|--------------------------|---------------|
| 52  | sediment processes                 | geomorphology              | geomorphology & glacial geology         | physical sciences        |               |
| 103 | stream morphology                  | geomorphology              | geomorphology                           | physical sciences        |               |
| 20  | landscape units                    | geomorphology              | geomorphology                           | physical sciences        | spatial scale |
| 69  | glaciers                           | glaciers                   | hydrology & water resources             | physical sciences        | water budget  |
| 18  | groundwater flow                   | groundwater                | hydrology & water resources             | physical sciences        | water budget  |
| 70  | groundwater                        | groundwater                | hydrology & water resources             | physical sciences        | water budget  |
| 23  | invasive aquatic species           | invasive aquatic species   | fishing & fisheries sciences/management | life sciences            |               |
| 50  | irrigation                         | irrigation                 | engineering                             | engineering              | water budget  |
| 53  | islands and extreme weather events | island and extreme weather | atmospheric science/meteorology         | physical sciences        |               |
| 62  | lakes                              | lakes                      | NA                                      | NA                       | water budget  |
| 60  | land use and cover change          | land use and cover change  | geography                               | social sciences          |               |
| 33  | marine science                     | marine science             | ocean/marine science                    | physical sciences        |               |
| 8   | pathogen                           | microbiology               | environmental health                    | life sciences            |               |
| 54  | plankton                           | microbiology               | microbiology                            | life sciences            |               |
| 68  | algae                              | microbiology               | biology                                 | life sciences            |               |
| 94  | microbiology                       | microbiology               | microbiology                            | life sciences            |               |
| 22  | mining                             | mining                     | engineering                             | engineering              |               |
| 11  | statistical modeling               | methods                    | statistics                              | mathematics & statistics | methods       |
| 78  | simulation modeling                | methods                    | NA                                      | NA                       | methods       |
| 15  | oceanography                       | oceans                     | oceanography, chemical and physical     | physical sciences        | water budget  |
| 100 | paleoclimatology                   | paleoclimate               | atmospheric chemistry & climatology     | physical sciences        |               |
| 3   | seed development                   | plants                     | botany/plant biology                    | life sciences            |               |

|     |                          |                          |                                 |                          |              |
|-----|--------------------------|--------------------------|---------------------------------|--------------------------|--------------|
| 21  | plant physiology         | plants                   | plant physiology                | life sciences            |              |
| 101 | precipitation            | precipitation            | hydrology & water resources     | physical sciences        | water budget |
| 10  | quantitative methods     | methods                  | mathematics/statistics, general | mathematics & statistics | methods      |
| 12  | statistics               | methods                  | statistics                      | mathematics & statistics | methods      |
| 74  | remote sensing           | methods                  | NA                              | NA                       | methods      |
| 43  | reservoirs               | reservoirs               | civil engineering               | engineering              | water budget |
| 82  | risk assessment          | methods                  | engineering                     | engineering              | methods      |
| 87  | rivers                   | rivers                   | hydrology & water resources     | physical sciences        | water budget |
| 37  | salt water               | salt water               | environmental science           | life sciences            | water budget |
| 2   | seasonal variability     | seasonal variability     | atmospheric science/meteorology | physical sciences        |              |
| 39  | soil                     | soil                     | soil sciences, other            | life sciences            | water budget |
| 28  | solar radiation          | solar radiation          | atmospheric science/meteorology | physical sciences        | water budget |
| 35  | spatial methods          | methods                  | NA                              | NA                       | methods      |
| 92  | stream ecology           | stream ecology           | ecology                         | life sciences            |              |
| 67  | surface water management | surface water management | civil engineering               | engineering              |              |
| 73  | temporal analysis        | methods                  | NA                              | NA                       | methods      |
| 27  | toxicology               | toxicology               | toxicology                      | life sciences            |              |
| 30  | metal contamination      | toxicology               | environmental toxicology        | life sciences            |              |
| 38  | contamination            | toxicology               | environmental toxicology        | life sciences            |              |
| 64  | wastewater               | waste water              | civil engineering               | engineering              | water budget |
| 51  | water governance         | water governance         | political science & governance  | social sciences          |              |
| 77  | water policy             | water policy             | NA                              | NA                       |              |
| 19  | drinking water quality   | water quality            | environmental health            | life sciences            |              |

|    |                                  |                            |                             |                   |               |
|----|----------------------------------|----------------------------|-----------------------------|-------------------|---------------|
| 98 | water quality assessment         | water quality              | hydrology & water resources | physical sciences |               |
| 44 | solid waste                      | water quality              | NA                          | NA                |               |
| 14 | urban water management           | water resources management | civil engineering           | engineering       |               |
| 40 | water supply services            | water resources management | civil engineering           | engineering       |               |
| 49 | water supply                     | water resources management | hydrology & water resources | physical sciences |               |
| 75 | water resources management       | water resources management | hydrology & water resources | physical sciences |               |
| 26 | water sampling                   | methods                    | NA                          | NA                | methods       |
| 13 | watershed                        | watershed                  | hydrology & water resources | physical sciences | spatial scale |
| 29 | watershed hydrological processes | watershed                  | hydrology & water resources | physical sciences | water budget  |
| 93 | wetlands                         | wetlands                   | hydrology & water resources | physical sciences | water budget  |
| 16 | NA                               | NA                         | NA                          | NA                |               |
| 42 | NA                               | NA                         | NA                          | NA                |               |
| 47 | NA                               | NA                         | NA                          | NA                |               |
| 57 | NA                               | NA                         | NA                          | NA                |               |
| 59 | NA                               | NA                         | NA                          | NA                |               |
| 71 | NA                               | NA                         | NA                          | NA                |               |
| 85 | NA                               | NA                         | NA                          | NA                |               |
| 99 | NA                               | NA                         | NA                          | NA                |               |

22 **Table S5.** Labels from the English topic model were grouped into four topic categories: general,  
 23 specific, methods and water budget.

| <b>General</b>           | <b>Specific</b>                         | <b>Budget</b>                           | <b>Methods</b>       |
|--------------------------|-----------------------------------------|-----------------------------------------|----------------------|
| engineering              | agricultural economics                  | canopy interception                     | analytical chemistry |
| life sciences            | agronomy & crop science                 | cloud formation and atmospheric science | community studies    |
| mathematics & statistics | analytical chemistry                    | glaciers                                | isotopes             |
| physical sciences        | animal science                          | groundwater                             | quantitative methods |
| social sciences          | atmospheric chemistry & climatology     | groundwater flow                        | remote sensing       |
|                          | atmospheric science/meteorology         | irrigation                              | risk assessment      |
|                          | biology                                 | lakes                                   | signal processing    |
|                          | botany/plant biology                    | oceanography                            | simulation modeling  |
|                          | chemistry                               | precipitation                           | spatial methods      |
|                          | civil engineering                       | reservoirs                              | statistical modeling |
|                          | ecology                                 | rivers                                  | statistics           |
|                          | engineering                             | salt water                              | temporal analysis    |
|                          | environmental health                    | soil                                    | water sampling       |
|                          | environmental science                   | solar radiation                         |                      |
|                          | environmental toxicology                | wastewater                              |                      |
|                          | fishing & fisheries sciences/management | watershed hydrological processes        |                      |
|                          | food science                            | wetlands                                |                      |
|                          | forest science & biology                |                                         |                      |
|                          | genetics/genomics, human & animal       |                                         |                      |
|                          | geochemistry                            |                                         |                      |
|                          | geography                               |                                         |                      |
|                          | geological & earth sciences             |                                         |                      |

|  |                                          |  |  |
|--|------------------------------------------|--|--|
|  | geology                                  |  |  |
|  | geomorphology                            |  |  |
|  | geomorphology & glacial geology          |  |  |
|  | geophysics & seismology                  |  |  |
|  | hydrology & water resources              |  |  |
|  | industrial & manufacturing engineering   |  |  |
|  | marine biology & biological oceanography |  |  |
|  | mathematics/statistics, general          |  |  |
|  | microbiology                             |  |  |
|  | mineralogy/petrology                     |  |  |
|  | ocean/marine science                     |  |  |
|  | oceanography, chemical and physical      |  |  |
|  | organic chemistry                        |  |  |
|  | petroleum engineering                    |  |  |
|  | plant physiology                         |  |  |
|  | political science & governance           |  |  |
|  | sociology                                |  |  |
|  | soil sciences, other                     |  |  |
|  | statistics                               |  |  |
|  | toxicology                               |  |  |
|  | wildlife biology                         |  |  |

25 **Table S6.** Correspondence between topic models in Spanish and Portuguese with respect to the  
 26 English topic model.

| <b>Criteria</b>                       | <b>Spanish topic model</b> | <b>Portuguese topic model</b> |
|---------------------------------------|----------------------------|-------------------------------|
| Relevant topics                       | 51                         | 44                            |
| Topics shared with the English corpus | 33                         | 19                            |
| Methods                               | 3                          | 6                             |
| Location-specific topics              | 8                          | 6                             |
| Water budget topics                   | 3                          | 4                             |

27

28 **Table S7.** Survey comments were coded for content and analyzed in Atlas.ti.

| <b>Comment content</b>                              | <b>Number of comments</b> |
|-----------------------------------------------------|---------------------------|
| Funding difficulties                                | 78                        |
| Perceived lack of collaboration                     | 31                        |
| Importance of interdisciplinary research            | 15                        |
| Emphasized international support (financial)        | 13                        |
| Importance of international collaborations          | 13                        |
| Politics as an obstacle                             | 12                        |
| Importance of climate change research               | 12                        |
| Lack of value/recognition granted to water research | 10                        |
| Total                                               | 391                       |

29

30     **Data S1. (separate file)** Socio-hydrologic attributes.
